# Supplementary material
Source: HighWire-hosted journal article supplement (https://erj.ersjournals.com/content/55/4/1901983)
Supplement: inline-supplementary-material-1 [file inline-supplementary-material-1.pdf]

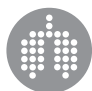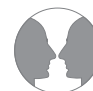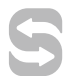

SHAREABLE PDF

# Impact of BAL lymphocytosis and presence of honeycombing on corticosteroid treatment effect in fibrotic hypersensitivity pneumonitis: a retrospective cohort study

Laurens J. De Sadeleer <sup>1,2</sup>, Frederik Hermans<sup>1</sup>, Els De Dycker<sup>1</sup>, Jonas Yserbyt<sup>1</sup>, Johnny A. Verschakelen<sup>3</sup>, Eric K. Verbeken<sup>4</sup>, Geert M. Verleden<sup>1,2</sup>, Stijn E. Verleden<sup>2</sup> and Wim A. Wuyts <sup>1,2</sup>

**Affiliations:** <sup>1</sup>Dept of Respiratory Diseases, University Hospitals Leuven, Leuven, Belgium. <sup>2</sup>Laboratory of Respiratory Diseases, KU Leuven, Leuven, Belgium. <sup>3</sup>Dept of Radiology, University Hospitals Leuven, Leuven, Belgium. <sup>4</sup>Dept of Pathology, University Hospitals Leuven, Leuven, Belgium.

**Correspondence:** Laurens J. De Sadeleer, Katholieke Universiteit Leuven, Laboratory of Respiratory Diseases, Dept of Chronic Diseases, Metabolism and Ageing (CHROMETA), Herestraat 49, box 706, Leuven 3000, Belgium. E-mail: laurens.desadeleer@kuleuven.be

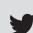

@ERSpublications

Low BAL lymphocytosis and presence of honeycombing predict poor outcome and absence of corticosteroid treatment effect in fibrotic hypersensitivity pneumonitis <http://bit.ly/2QUl0K6>

**Cite this article as:** De Sadeleer LJ, Hermans F, De Dycker E, *et al.* Impact of BAL lymphocytosis and presence of honeycombing on corticosteroid treatment effect in fibrotic hypersensitivity pneumonitis: a retrospective cohort study. *Eur Respir J* 2020; 55: 1901983 [<https://doi.org/10.1183/13993003.01983-2019>].

This single-page version can be shared freely online.

## To the Editor:

According to a survey study conducted by WIJSENBEK *et al.* [1], 76% of respiratory physicians believe fibrotic hypersensitivity pneumonitis (fibrotic HP, fHP) should be treated with corticosteroids (CS) as first line treatment. However, data to support such a strategy are limited and confined to acute farmer's lung [2]. Classically, HP patients are classified according to symptom chronicity in acute and chronic HP [3]. Based on new data, however, a stratification according to the (radiological) presence of fibrosis seems more in line with prognosis [4]. In an earlier study, we demonstrated that CS treatment was only beneficial in non-fibrotic HP while CS was not effective in fHP, both in terms of survival, and decline in forced vital capacity (FVC) and diffusing capacity of the lung for carbon monoxide ( $D_{LCO}$ ) [5]. In the present study, we determined whether the presence of bronchoalveolar lavage lymphocytosis (BAL lymphocytosis, BALL) or honeycombing influences the treatment effect of CS in fHP patients.
